# Supplementary material
Source: publisher figshare collection journal article supplement (https://acs.figshare.com/ndownloader/files/20163995)
Supplement: Supplementary file 1 [file 20163995]

Supporting Information

**Preserving Aryl Ether Linkages and Higher Yields of Isolated Lignin through Biomass Fibrillation**

Samarthya Bhagia<sup>a</sup>, and Arthur J. Ragauskas<sup>b,c,d\*</sup>

<sup>a</sup>Biosciences Division, Oak Ridge National Laboratory, Oak Ridge, TN 37831, USA

<sup>b</sup>Department of Chemical and Biomolecular Engineering, University of Tennessee, Knoxville, TN 37996, USA

<sup>c</sup>Joint Institute of Biological Sciences, Biosciences Division, Oak Ridge National Laboratory, Oak Ridge, TN 37831, USA

<sup>d</sup>Center for Renewable Carbon, Department of Forestry, Wildlife, and Fisheries, University of Tennessee Institute of Agriculture, Knoxville, TN 37996, USA

\* Arthur J. Ragauskas  
[aragausk@utk.edu](mailto:aragausk@utk.edu)

Number of Pages: 12

Number of Figures: 5

Number of Tables: 3

## Table of Contents:

### Experimental

|                                                                                                                                    |     |
|------------------------------------------------------------------------------------------------------------------------------------|-----|
| Materials.....                                                                                                                     | S3  |
| Molecular Weight.....                                                                                                              | S3  |
| Spectroscopy.....                                                                                                                  | S4  |
| Sugar Quantification.....                                                                                                          | S5  |
| Water Retention Value.....                                                                                                         | S5  |
| <b>Fig. S1</b> Experimental strategy for recovering cellulolytic enzyme lignin (CEL) from biomass.....                             | S6  |
| <b>Table S1.</b> Enzymatic hydrolysis yields.....                                                                                  | S7  |
| <b>Table S2.</b> Mid-infrared spectra band assignments.....                                                                        | S7  |
| <b>Fig S2.</b> Lignin substructures.....                                                                                           | S8  |
| <b>Fig S3.</b> $^{13}\text{C}$ - $^1\text{H}$ HSQC NMR spectra of cellulolytic enzyme lignin isolated from ball-milled poplar..... | S9  |
| <b>Fig S4.</b> $^{13}\text{C}$ - $^1\text{H}$ HSQC NMR spectra of cellulolytic enzyme lignin isolated from fibrillated poplar..... | S10 |
| <b>Table S3.</b> $^{13}\text{C}$ - $^1\text{H}$ HSQC NMR chemical shifts and assignments of lignin.....                            | S11 |
| <b>Calculations</b> .....                                                                                                          | S11 |
| <b>Fig S5.</b> Gel permeation chromatographs of purified lignins isolated from ball-milled and fibrillated poplar .....            | S12 |

## Experimental

### Materials

Reference poplar (GW-9947S) chips were procured from Center for Bioenergy Innovation (CBI) program at the Oak Ridge National Laboratory. The chips were knife-milled in model 4 Wiley mill (Thomas Scientific, Swedesboro, NJ) using 1 mm screen. Soxhlet extraction was carried out for 6 h using 2:1 v/v toluene: ethanol to obtain extractives-free poplar. Biomass composition was determined by two-step acid hydrolysis NREL procedure<sup>12,13</sup>. Accellerase 1500 (cellulases) and Accellerase XY (xylanases) were kind gifts from Dupont Industrial Biosciences. Lyophilized pectinase from *Aspergillus niger* (Alfa Aesar EINECS 232-885-6, 20 U/mg) was purchased through Fisher Scientific and lyophilized non-specific protease (Pronase protease from *Streptomyces griseus*, EC no. 232-909-5, 45 KU/g) was purchased through Sigma Aldrich. All other chemicals were of analytical grade and were purchased through Fisher Scientific and Sigma Aldrich.

### Molecular Weight

The purified lignins were vacuum-dried in 20 mL scintillation vials at 40 °C overnight. Acetylation was then carried out in 20 mL vials using 1:1 v/v acetic anhydride: pyridine for 24 h at room temperature with magnetic stirring. Then ethanol was added to stop the reaction followed by rotary evaporation. The residual pyridine was evaporated by vacuum drying at 40 °C overnight. Then, HPLC-grade tetrahydrofuran was added to the vials and kept overnight. The liquids were then transferred to HPLC vials through syringe-filtration using 0.22 µm hydrophobic PTFE filters. Gel permeation chromatography was carried out through Agilent 1260 Infinity II chromatography module with UV detector (Agilent G7114A Variable Wavelength Detector), Agilent PLGel organic GPC 5 µm diameter, 250 mm length and 500, 10<sup>4</sup> and 10<sup>5</sup> Å

individual pore size columns connected in series at 0.5 mL/min tetrahydrofuran mobile phase at 25 °C. The molecular weights were calculated based on polystyrene calibration and softwood kraft lignin was taken through the procedure for validation.

### Spectroscopy

#### NMR

The duplicate purified lignin samples were combined, vacuum dried and then dissolved in DMSO-d<sub>6</sub> and transferred into NMR tubes. The concentrations of lignin samples were ~80 mg/mL (~40 mg purified lignin + 0.5 mL DMSO-d<sub>6</sub>). <sup>13</sup>C-<sup>1</sup>H heteronuclear single quantum coherence (HSQC) nuclear magnetic resonance (NMR) spectroscopy was carried out through Bruker NMR equipped with a 5 mm Broadband Observe probe at 300 K using standard ‘hsqcetgpsisp2.2’ pulse program that had a spectral widths of 220 ppm in <sup>13</sup>C frequency (256 data points) and 12 ppm (2048 data points) in <sup>1</sup>H frequency and 1 sec interscan delay and 64 scans.

#### Mid-IR

Mid-infrared spectroscopy was carried out on Perkin Elmer Spectrum 100 instrument with attenuated total reflectance (ATR) accessory. 64 scans from 4000 to 600 cm<sup>-1</sup> were carried out on purified lignins isolated from ball-milled and fibrillated biomass. Atmospheric suppression option was chosen on Spectrum software and the raw data were converted from %transmittance to absorbance. Baseline was correct using rubber band method using the same wavenumbers on both lignins. Peak height at 1505 cm<sup>-1</sup> was scaled to 1.0 absorbance to normalize the spectra.

### Sugar Quantification

Aliquots were taken at the end of 48 h after the initial and second enzymatic hydrolysis and centrifuged. The supernatants were syringe-filtered and glucose and xylose concentrations were analyzed through high pressure anion exchange chromatography - pulsed amperometric detection (HPAEC-PAD) (Dionex ICS-3000) using CarboPac PA1 column and 2 mM NaOH mobile phase. Fucose was used as an internal standard and glucose and xylose standards for calibration.

### Water Retention Value

Water retention values (WRV) were determined as per the procedure described previously<sup>14</sup>. It is the ratio of the weight of water retained in the sample after centrifugation to the oven dry weight.

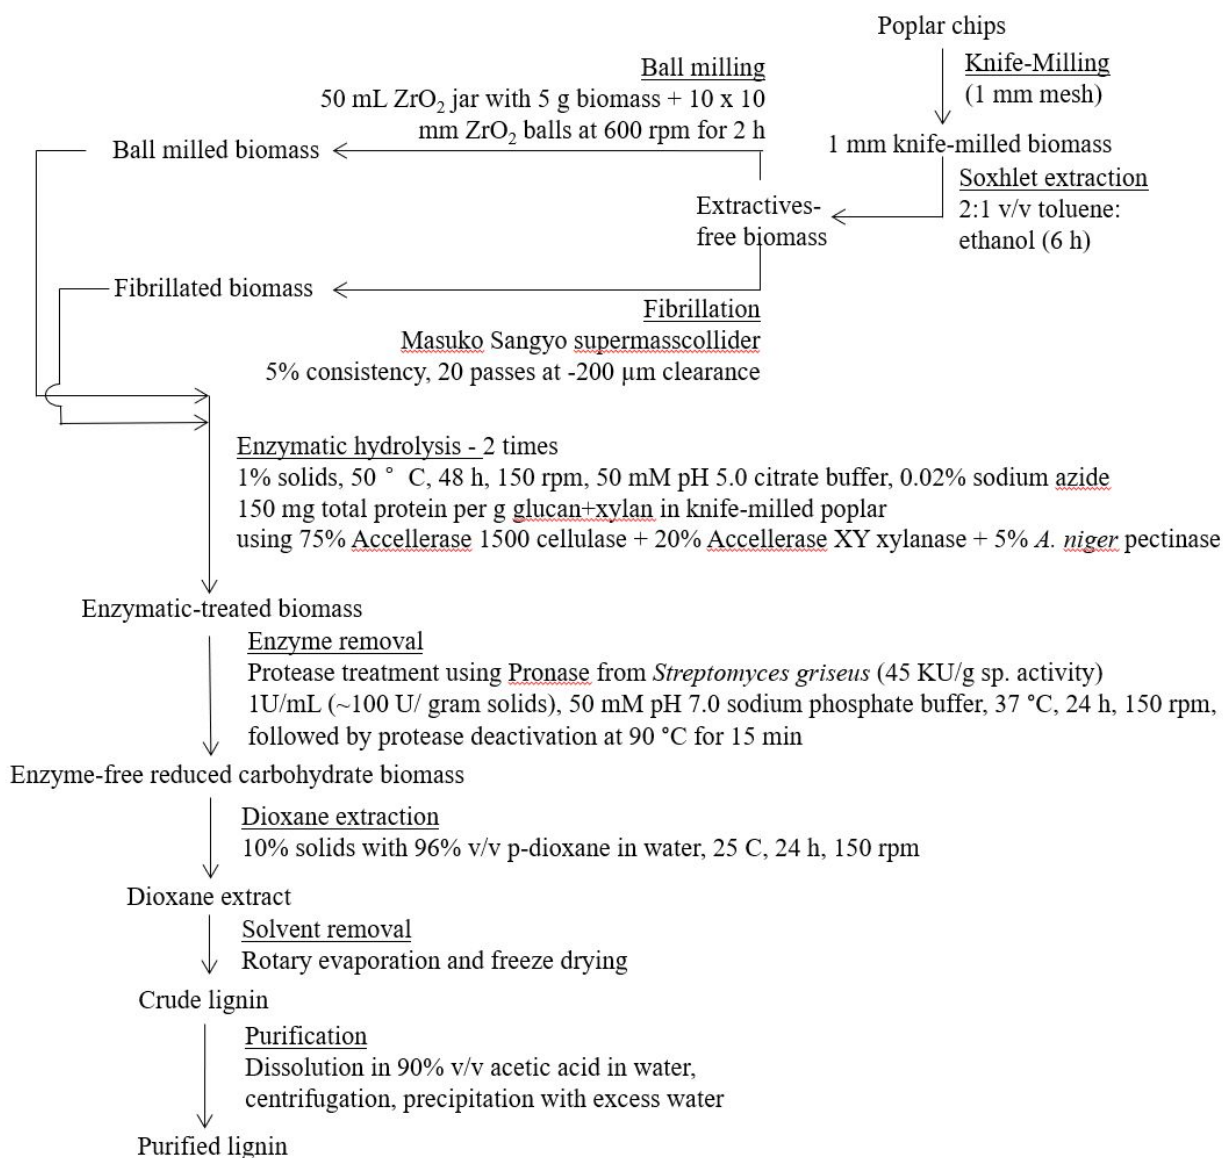

**Fig S1.** Experimental strategy for recovering cellulolytic enzyme lignin (CEL) from biomass

**Table S1.** Enzymatic hydrolysis yields

| Time     | Substrate   | Glucan %   | Xylan %    | Glucan+Xylan % |
|----------|-------------|------------|------------|----------------|
| 1st 48 h | ball-milled | 44.5 (0.4) | 33.6 (2.3) | 40.9 (0.9)     |
|          | fibrillated | 53.0 (0.8) | 33.6 (1.4) | 46.7 (1.0)     |
| 2nd 48 h | ball-milled | 8.7 (0.8)  | 3.4 (2.2)  | 7.0 (1.3)      |
|          | fibrillated | 15.0 (1.0) | 9.7 (1.1)  | 13.3 (1.0)     |

values in parentheses represent standard deviation

**Table S2.** Mid-infrared spectra band assignments

| Wavenumber (cm <sup>-1</sup> ) | Assignment                                                                     |
|--------------------------------|--------------------------------------------------------------------------------|
| 3430                           | O-H stretch                                                                    |
| 2937                           | C- H stretch in methyl and methylene                                           |
| 1705                           | C=O stretch in unconjugated ketones, conjugated aldehydes and carboxylic acids |
| 1660                           | C=O stretch in conjugated p- substituted aryl ketones                          |
| 1591                           | aromatic skeletal vibrations + C=O stretch                                     |
| 1505                           | aromatic skeletal vibrations                                                   |
| 1459                           | C-H deformations                                                               |
| 1420                           | C-H deformations                                                               |
| 1326                           | Syringyl ring + condensed guaiacyl                                             |
| 1270                           | Guaiacyl ring + C=O stretch                                                    |
| 1240                           | O=C-O in acetylated xylan and in uronic acids                                  |
| 1220                           | C-C + C-O + C=O stretch                                                        |
| 1185                           | C-O of polysaccharides                                                         |
| 1150                           | C-O-C vibrations                                                               |
| 1120                           | C-O-C vibrations                                                               |
| 1027                           | aromatic in plane C-H deformation                                              |
| 920                            | C-H out of plane deformation                                                   |
| 885                            | C-H deformations                                                               |
| 834                            | trisubstituted aromatic ring                                                   |
| 771                            | C-H out-of-plane bending of aromatic ring                                      |

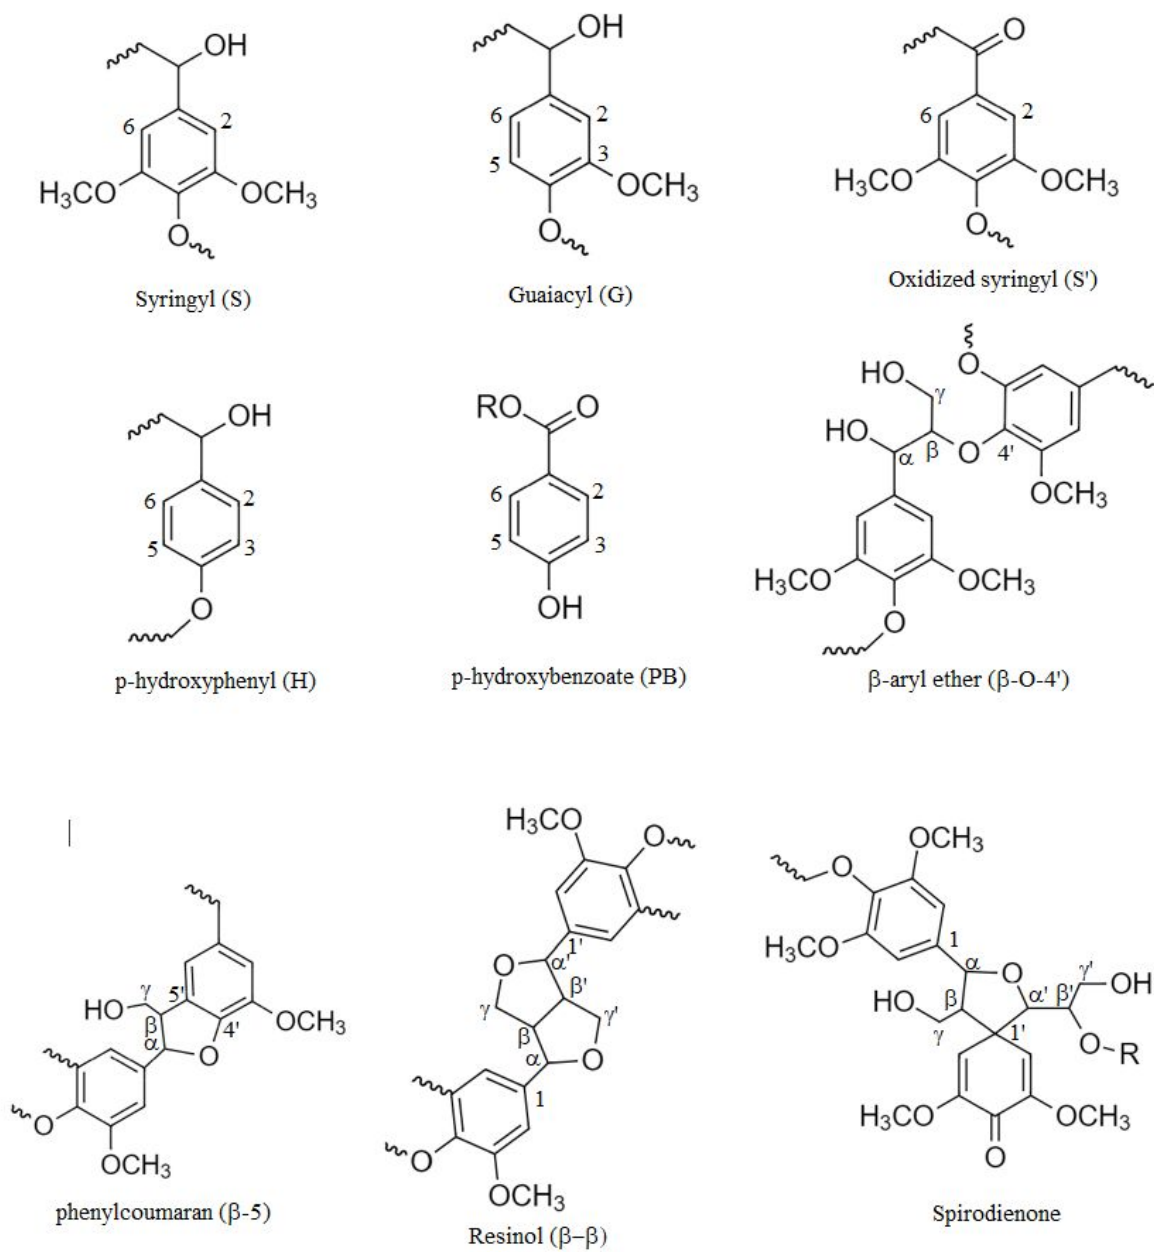

**Fig S2.** Lignin substructures



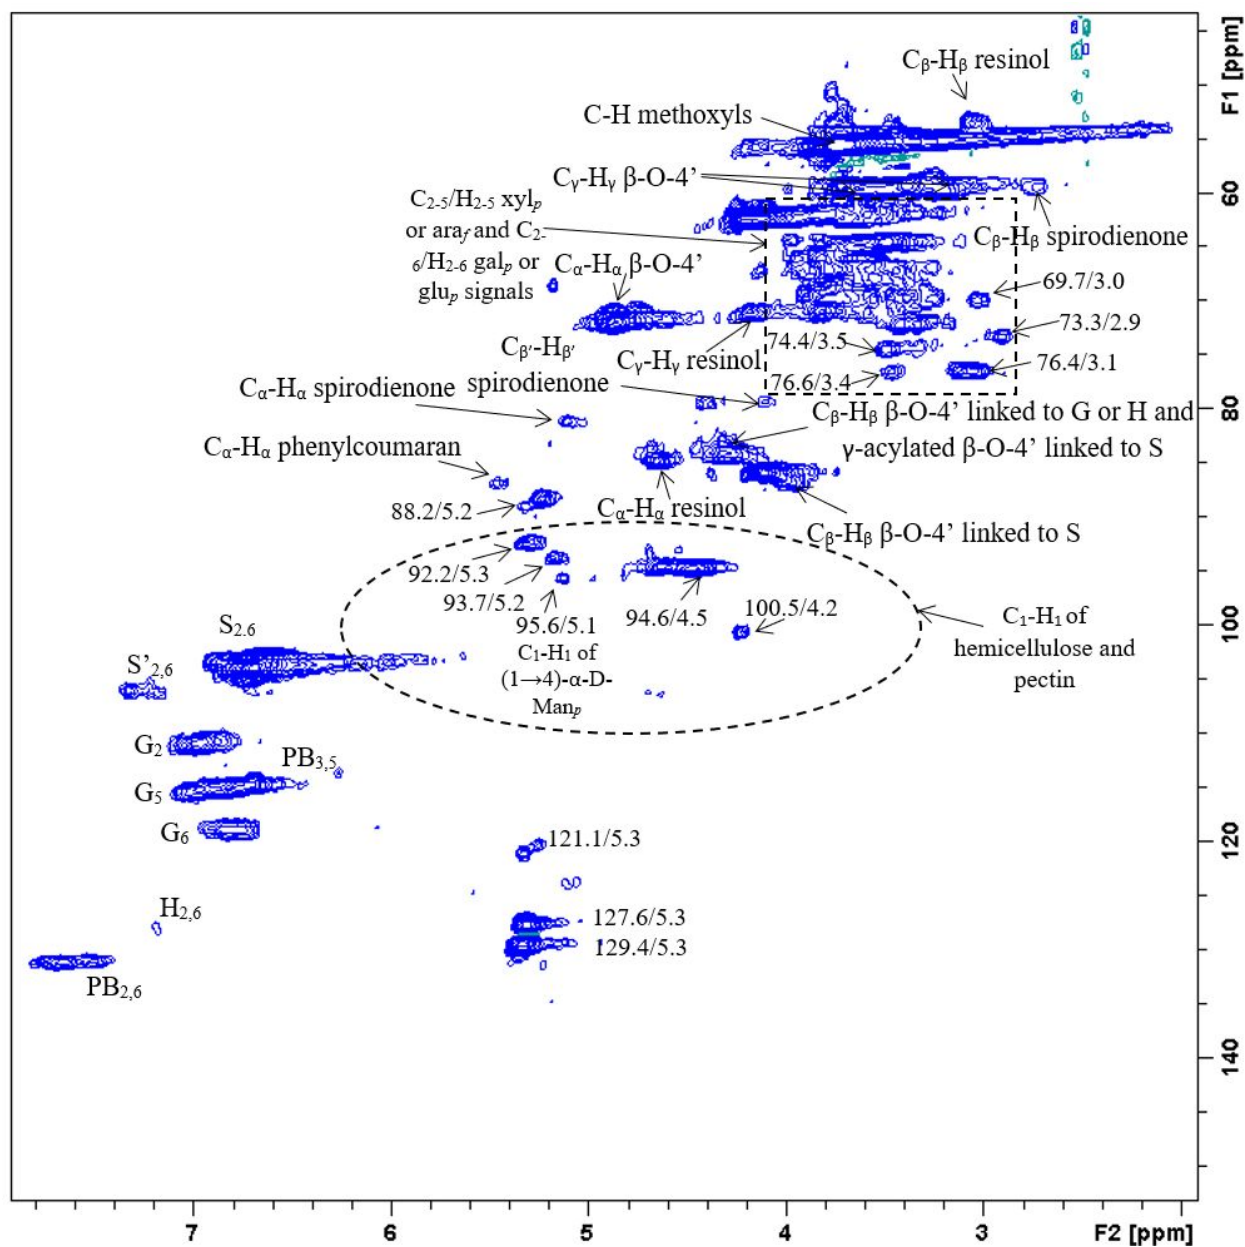

**Fig S3.**  $^{13}C$ - $^1H$  HSQC NMR spectra of cellulolytic enzyme lignin isolated from ball-milled poplar

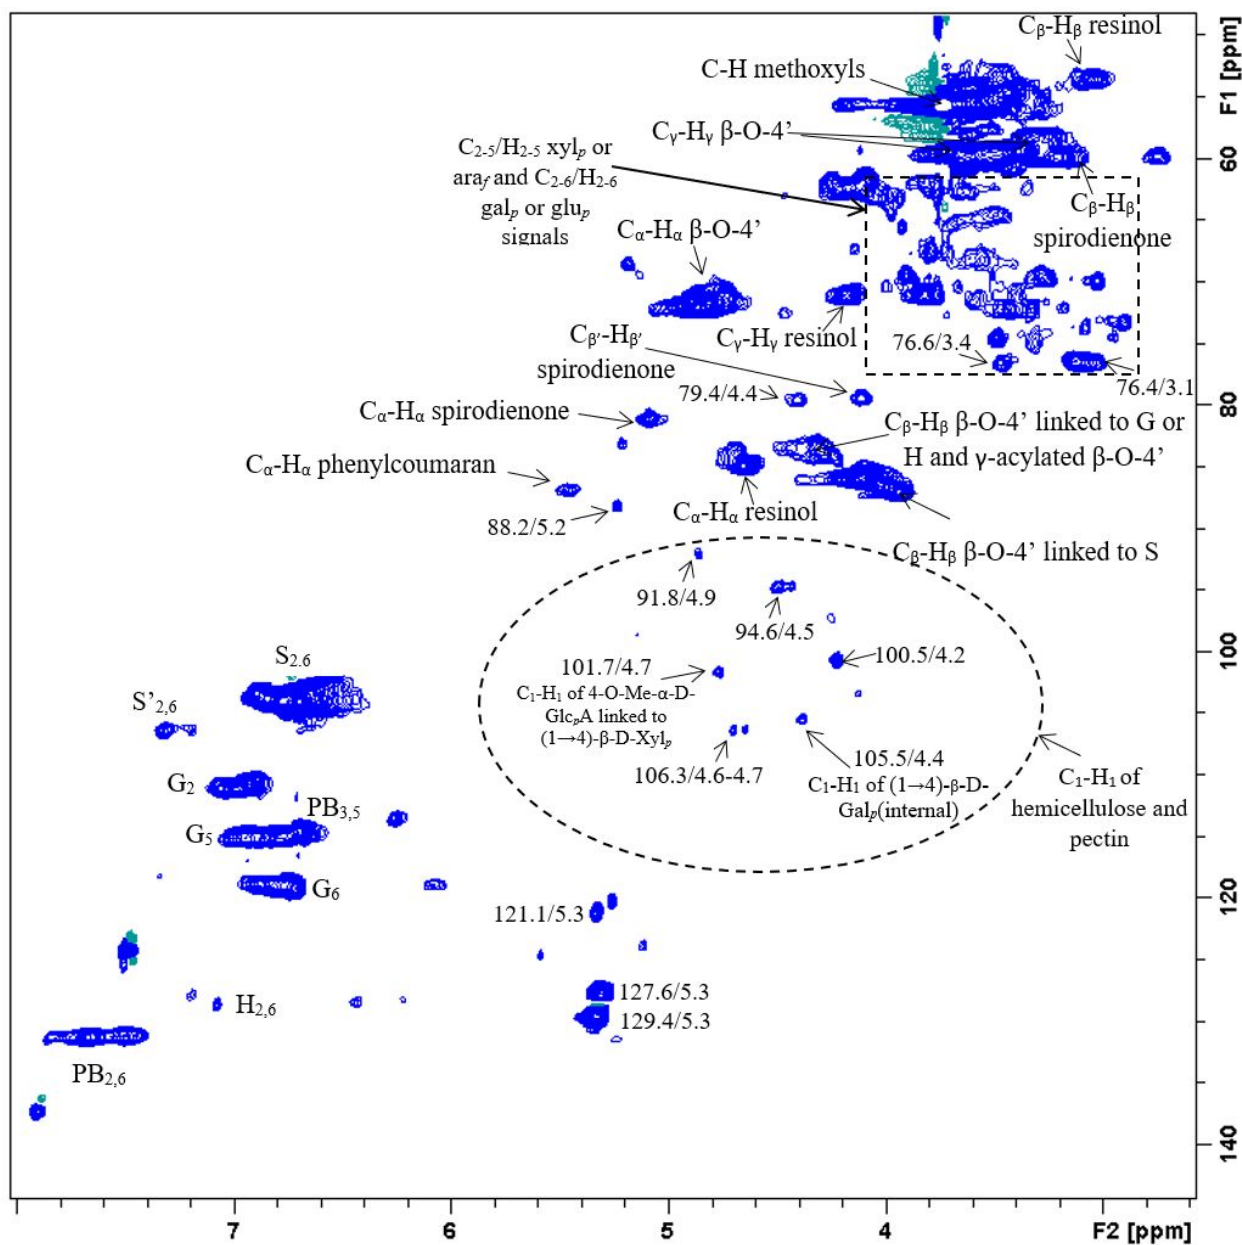

**Fig S4.**  $^{13}\text{C}$ - $^1\text{H}$  HSQC NMR spectra of cellulolytic enzyme lignin isolated from fibrillated poplar

**Table S3.**  $^{13}\text{C}$ - $^1\text{H}$  HSQC NMR chemical shifts and assignments of lignin

| $^{13}\text{C}$ (ppm) | $^1\text{H}$ (ppm) | Assignment                                                                                                                      |
|-----------------------|--------------------|---------------------------------------------------------------------------------------------------------------------------------|
| 53.55                 | 3.07               | $\text{C}_\beta\text{-H}_\beta$ of resinol ( $\beta$ - $\beta$ )                                                                |
| 55.44                 | 3.71               | C-H of methoxyls                                                                                                                |
| 59.24                 | 3.71               | $\text{C}_\gamma\text{-H}_\gamma$ of $\beta$ -O-4'                                                                              |
| 59.31                 | 3.39               | $\text{C}_\gamma\text{-H}_\gamma$ of $\beta$ -O-4'                                                                              |
| 59.46                 | 2.73               | $\text{C}_\beta\text{-H}_\beta$ of spirodienone                                                                                 |
| 70.99                 | 4.18               | $\text{C}_\gamma\text{-H}_\gamma$ of resinol ( $\beta$ - $\beta$ )                                                              |
| 71.86                 | 4.87               | $\text{C}_\alpha\text{-H}_\alpha$ of $\beta$ -O-4'                                                                              |
| 81.16                 | 5.1                | $\text{C}_\alpha\text{-H}_\alpha$ of spirodienone                                                                               |
| 79.4                  | 4.1                | $\text{C}_{\beta'}\text{-H}_{\beta'}$ of spirodienone                                                                           |
| 83.89                 | 4.3                | $\text{C}_\beta\text{-H}_\beta$ of $\beta$ -O-4' linked to G and H units and $\gamma$ -acylated $\beta$ -O-4' linked to S units |
| 84.7                  | 4.66               | $\text{C}_\alpha\text{-H}_\alpha$ of resinol ( $\beta$ - $\beta'$ )                                                             |
| 85.77                 | 4.11               | $\text{C}_\beta\text{-H}_\beta$ of $\beta$ -O-4' linked to S unit                                                               |
| 86.75                 | 5.47               | $\text{C}_\alpha\text{-H}_\alpha$ of phenylcoumaran ( $\beta$ -5')                                                              |
| 103.75                | 6.69               | $\text{C}_{2,6}\text{-H}_{2,6}$ of syringyl (S) unit                                                                            |
| 105.94                | 7.23               | $\text{C}_{2,6}\text{-H}_{2,6}$ of oxidized S (S') unit                                                                         |
| 106.07                | 7.32               | $\text{C}_{2,6}\text{-H}_{2,6}$ of oxidized S (S') unit                                                                         |
| 110.99                | 6.97               | $\text{C}_2\text{-H}_2$ of guaiacyl (G) unit                                                                                    |
| 114.84                | 6.74               | $\text{C}_{3,5}\text{-H}_{3,5}$ of p-hydroxybenzoate                                                                            |
| 115.06                | 6.97               | $\text{C}_5\text{-H}_5$ of G unit                                                                                               |
| 118.84                | 6.83               | $\text{C}_6\text{-H}_6$ of G unit                                                                                               |
| 127.8                 | 7.19               | $\text{C}_{2,6}\text{-H}_{2,6}$ of p-hydroxyphenyl (H) unit                                                                     |
| 131.11                | 7.65               | $\text{C}_{2,6}\text{-H}_{2,6}$ of p-hydroxybenzoate                                                                            |

**Calculations:**

Volume integral of syringyl  $\text{C}_2\text{-H}_2$  and  $\text{C}_6\text{-H}_6$  ( $\text{S}_{2/6}$  @ 103.75/6.69 ppm) = S

Volume integral of guaiacyl  $\text{C}_2\text{-H}_2$  ( $\text{G}_2$  @ 110.99/6.97 ppm) = G

Volume integral of p-hydroxyphenyl  $\text{C}_2\text{-H}_2$  and  $\text{C}_6\text{-H}_6$  ( $\text{H}_{2/6}$  @ 127.8/7.19 ppm) = H

Volume integral of p-hydroxybenzoate  $\text{C}_2\text{-H}_2$  and  $\text{C}_6\text{-H}_6$  ( $\text{PB}_{2/6}$  @ 131.11/7.65 ppm) = PB

Volume integral of  $\text{C}_\alpha\text{-H}_\alpha$  of  $\beta$ -O-4' ( $\beta$ -O-4' @ 71.86/4.87 ppm) =  $\beta$ -O-4'

Volume integral of  $\text{C}_\alpha\text{-H}_\alpha$  of phenylcoumaran ( $\beta$ -5' @ 86.75/5.47 ppm) =  $\beta$ -5'

Volume integral of  $\text{C}_\alpha\text{-H}_\alpha$  and  $\text{C}_{\alpha'}\text{-H}_{\alpha'}$  of resinol ( $\beta$ - $\beta'$  @ 84.7/4.66 ppm) =  $\beta$ - $\beta'$

Volume integral can be calculated by first assigning a value of 100 to S<sub>2/6</sub> signal and then measuring the integrals for all other lignin C-H lignin signals relative to S<sub>2/6</sub> signal of the <sup>13</sup>C-<sup>1</sup>H HSQC spectra using TopSpin software (Bruker).

$$\text{Syringyl (S) \%} = \frac{S/2}{S/2 + G + H/2} * 100$$

$$\text{Guaiacyl (G) \%} = \frac{G}{S/2 + G + H/2} * 100$$

$$\text{p-hydroxyphenyl (H) \%} = \frac{H/2}{S/2 + G + H/2} * 100$$

$$\text{p-hydroxybenzoate (PB) \%} = \frac{PB/2}{S/2 + G + H/2} * 100$$

$$\beta\text{-}\beta' \% = \frac{\beta - \beta/2}{S/2 + G + H/2} * 100$$

$$\beta\text{-O-4' \%} = \frac{\beta - O - 4}{S/2 + G + H/2} * 100$$

$$\beta\text{-5' \%} = \frac{\beta - 5}{S/2 + G + H/2} * 100$$

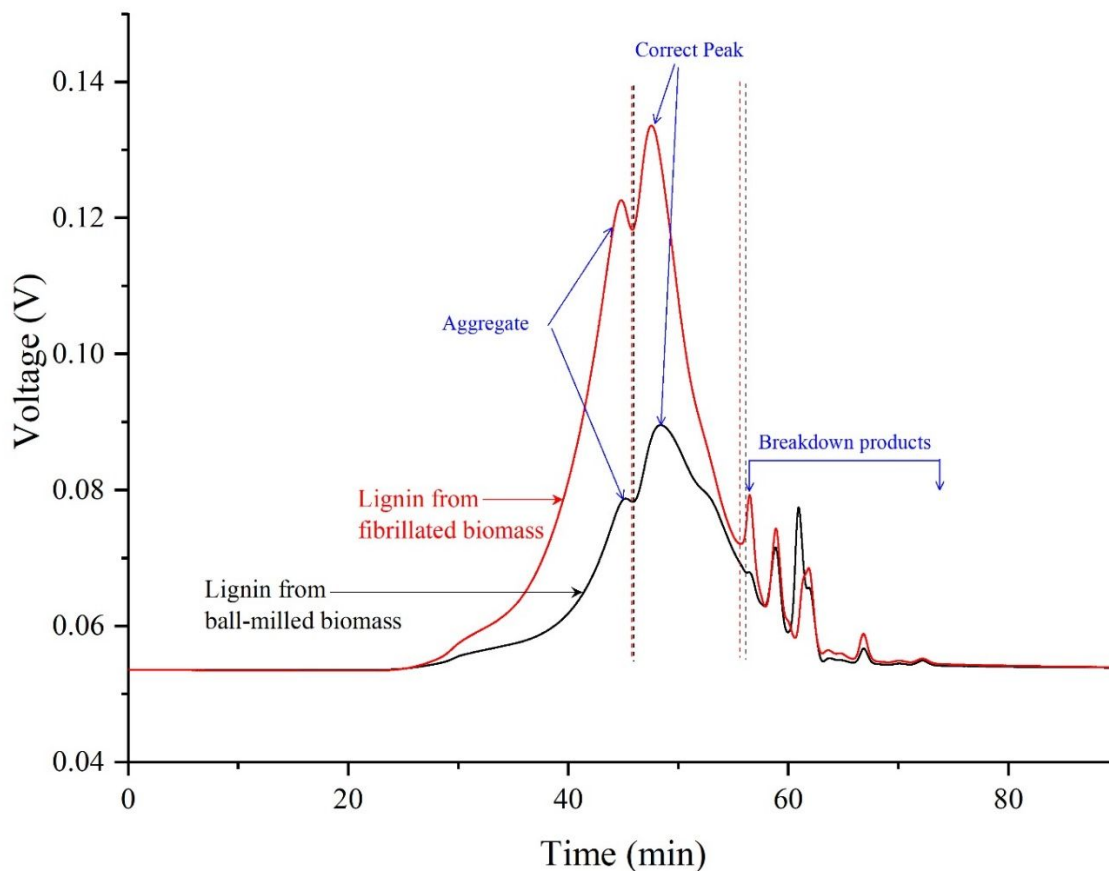

**Fig S5.** Gel permeation chromatographs of purified lignins isolated from ball-milled and fibrillated poplar
